# Supplementary material
Source: publisher figshare collection journal article supplement (https://karger.figshare.com/ndownloader/files/28323180)
Supplement: Supplementary file 1 [file 28323180]

**Fig. S1** F1F0-ATPase subunit amino acid alignments.

**Subunit A:**

M3BA VETTSNPTVSLFGIDFDLTVLAMSLLTVIIVFGVVFWSSRKMTIKPKGKQNVLEFIYEFV 60

J1A VETTSNPTVSLFGIDFDLTVLAMSLLTVIIVFGVVFWSSRKMTIKPKGKQNVLEFIYEFV 60

T2A VETTSNPTVSLFGIDFDLTVLAMSLLTVIIVFGVVFWSSRKMTIKPKGKQNVLEFIYEFV 60

M3A VETTSNPTVSLFGIDFDLTVLAMSLLTVIIVFGVVFWSSRKMTIKPKGKQNVLEFIYEFV 60

W2 VETTSNPTVSLFGIDFDLTVLAMSLLTVIIVFGVVFWSSRKMTIKPKGKQNVLEFIYEFV 60

J1B VETTSNPTVSLFGIDFDLTVLAMSLLTVIIVFGVVFWSSRKMTIKPKGKQNVLEFIYEFV 60

R1A VETTSNPTVSLFGIDFDLTVLAMSLLTVIIVFGVVFWSSRKMTIKPKGKQNVLEFIYEFV 60

K12 VETTSNPTVSLFGIDFDLTVLAMSLLTVIIVFGVVFWSSRKMTIKPKGKQNVLEFIYEFV 60

G1A VETTSNPTVSLFGIDFDLTVLAMSLLTVIIVFGVVFWSSRKMTIKPKGKQNVLEFIYEFV 60

M1A VETTSNPTVSLFGIDFDLTVLAMSLLTVIIVFGVVFWSSRKMTIKPKGKQNVLEFIYEFV 60

Fenella VETTSNPTVSLFGIDFDLTVLAMSLLTVIIVFGVVFWSSRKMTIKPKGKQNVLEFIYEFV 60

J3A VETTSNPTVSLFGIDFDLTVLAMSLLTVIIVFGVVFWSSRKMTIKPKGKQNVLEFIYEFV 60

G3B VETTSNPTVSLFGIDFDLTVLAMSLLTVIIVFGVVFWSSRKMTIKPKGKQNVLEFIYEFV 60

************************************************************

M3BA NSTISQSLGKFTKNYSLLLFVIFTFVFTANNLGLLVSVKSEHYNFWTSPTSNFGVTITLS 120

J1A NSTISQNLGKFTKNYSLLLFVIFTFVFTANNLGLLVSVKSEHYNFWTSPTSNFGVTITLS 120

T2A NSTISQNLGKFTKNYSLLLFVIFTFVFTANNLGLLVSVKSEHYNFWTSPTSNFGVTITLS 120

M3A NSTISQSLGKFTKNYSLLLFVIFTFVFTANNLGLLVSVKSEHYNFWTSPTSNFGVTITLS 120

W2 NSTISQSLGKFTKNYSLLLFVIFTFVFTANNLGLLVSVKSEHYNFWTSPTSNFGVTITLS 120

J1B NSTISQNLGKFTKNYSLLLFVIFTFVFTANNLGLLVSVKSEHYNFWTSPTSNFGVTITLS 120

R1A NSTISQNLGKFTKNYSLLLFVIFTFVFTANNLGLLVSVKSEHYNFWTSPTSNFGVTITLS 120

K12 NSTISQNLGKFTKNYSLLLFVIFTFVFTANNLGLLVSVKSEHYNFWTSPTSNFGVTITLS 120

G1A NSTISQSLGKFTKNYSLLLFVIFTFVFTANNLGLLVSVKSEHYNFWTSPTSNFGVTITLS 120

M1A NSTISQSLGKFTKNYSLLLFVIFTFVFTANNLGLLVSVKSEHYNFWTSPTSNFGVTITLS 120

Fenella NSTISQSLGKFTKNYSLLLFVIFTFVFTANNLGLLVSVKSEHYNFWTSPTSNFGVTITLS 120

J3A NSTISQSLGKFTKNYSLLLFVIFTFVFTANNLGLLVSVKSEHYNFWTSPTSNFGVTITLS 120

G3B NSTISQSLGKFTKNYSLLLFVIFTFVFTANNLGLLVSVKSEHYNFWTSPTSNFGVTITLS 120

******.*****************************************************

M3BA LIITLISHIEGIRKKGFKGYLKGYLSPYPAMLPMNILEQLTNLASLALRLFGNIYSGEVL 180

J1A LIITLISHIEGIRKKGFKGYLKGYLSPYPAMLPMNILEQLTNLASLALRLFGNIYSGEVL 180

T2A LIITLISHIEGIRKKGFKGYLKGYLSPYPAMLPMNILEQLTNLASLALRLFGNIYSGEVL 180

M3A LIITLISHIEGIRKKGFKGYLKGYLSPYPAMLPMNILEQLTNLASLALRLFGNIYSGEVL 180

W2 LIITLISHIEGIRKKGFKGYLKGYLSPYPAMLPMNILEQLTNFASLALRLFGNIYSGEVL 180

J1B LIITLISHIEGIRKKGFKGYLKGYLSPYPAMLPMNILEQLTNLASLALRLFGNIYSGEVL 180

R1A LIITLISHIEGIRKKGFKGYLKGYLSPYPAMLPMNILEQLTNLASLALRLFGNIYSGEVL 180

K12 LIITLISHIEGIRKKGFKGYLKGYLSPYPAMLPMNILEQLTNLASLALRLFGNIYSGEVL 180

G1A LIITLISHIEGIRKKGFKGYLKGYLSPYPAMLPMNILEQLTNLASLALRLFGNIYSGEVL 180

M1A LIITLISHIEGIRKKGFKGYLKGYLSPYPAMLPMNILEQLTNLASLALRLFGNIYSGEVL 180

Fenella LIITLISHIEGIRKKGFKGYLKGYLSPYPAMLPMNILEQLTNLASLALRLFGNIYSGEVL 180

J3A LIITLISHIEGIRKKGFKGYLKGYLSPYPAMLPMNILEQLTNPASLALRLFGNIYSGEVL 180

G3B LIITLISHIEGIRKKGFKGYLKGYLSPYPAMLPMNILEQLTNLASLALRLFGNIYSGEVL 180

****************************************** *****************

M3BA TGLILQLVTWSAFAAPVSFALNLVWVAFSAFIGFIQAYVFIILSSNYIGDKVNEE 235

J1A TGLILKLVTWSVFAAPVSFALNLVWVAFSAFIGFIQAYVFIILSSNYIGDKVNEE 235

T2A TGLILKLVTWSVFAAPVSFALNLVWVAFSAFIGFIQAYVFIILSSNYIGDKVNEE 235

M3A TGLILQLVTWSAFAAPVSFALNLVWVAFSAFIGFIQAYVFIILSSNYIGDKVNEE 235

W2 TGLILQLVTWSAFAAPVSFALNLVWVAFSAFIGFIQAYVFIILSSNYIGDKVNEE 235

J1B TGLILKLVTWSVFAAPVSFALNLVWVAFSAFIGFIQAYVFIILSSNYIGDKVNEE 235

R1A TGLILKLVTWSVFAAPVSFALNLVWVAFSAFIGFIQAYVFIILSSNYIGDKVNEE 235

K12 TGLILQLVTWSAFAAPVSFALNLVWVAFSAFIGFIQAYVFIILSSNYIGDKVNEE 235

G1A TGLILQLVTWSAFAAPVSFALNLVWVAFSAFIGFIQAYVFIILSSNYIGDKVNEE 235

M1A TGLILQLVTWSAFAAPVSFALNLVWVAFSAFIGFIQAYVFIILSSNYIGDKVNEE 235

Fenella TGLILQLVTWSAFAAPVSFALNLVWVAFSAFIGFIQAYVFIILSSNYIGDKVNEE 235

J3A TGLILQLVTWSAFAAPVSFALNLVWVAFSAFIGFIQAYVFIILSSNYIGDKVNEE 235

G3B TGLILQLVTWSAFAAPVSFALNLVWVAFSAFIGFIQAYVFIILSSNYIGDKVNEE 235

*****:*****.*******************************************

**Subunit B**

M3BA MSILINSTTLGNIIITLGSVFLLYYLIRKFAWDQITGIFAAREKKIATDIDSAENARQEA 60

J1A MSLLINSTTLGNIIITLGSVFLLYYLIRKFAWDQITGIFAAREKKIATDIDSAENARQEA 60

T2A MSLLINSTTLGNIIITLGSVFLLYYLIRKFAWDQITGIFAAREKKIATDIDSAENARQEA 60

M3A MSILINSTTLGNIIITLGSVFLLYYLIRKFAWDQITGIFAAREKKIATDIDSAENARQEA 60

W2 MSLLINSTTLGNIIITLGSVFLLYYLIRKFAWDQITGIFAAREKKIATDIDSAENARQEA 60

J1B MSLLINSTTLGNIIITLGSVFLLYYLIRKFAWDQITGIFAAREKKIATDIDSAENARQEA 60

R1A MSLLINSTTLGNIIITLGSVFLLYYLIRKFAWDQITGIFAAREKKIATDIDSAENARQEA 60

K12 MSLLINSTTLGNIIITLGSVFLLYYLIRKFAWDQITGIFAAREKKIATDIDSAENARQEA 60

G1A MSILINSTTLGNIIITLGSVFLLYYLIRKFAWDQITGIFAAREKKIATDIDSAENARQEA 60

M1A MSILINSTTLGNIIITLGSVFLLYYLIRKFAWDQITGIFAAREKKIATDIDSAENARQEA 60

FENELLA MSILINSTTLGNIIITLGSVFLLYYLIRKFAWDQITGIFAAREKKIATDIDSAENARQEA 60

J3A MSILINSTTLGNIIITLGSVFLLYYLIRKFAWDQITGIFAAREKKIATDIDSAENARQEA 60

G3B MSILINSTTLGNIIITLGSVFLLYYLIRKFAWDQITGIFAAREKKIATDIDSAENARQEA 60

**:*********************************************************

M3BA ESLAQKRQDELAGARTEAAQIIDGAKETGKTQESKIIAEAHDEAKRLKEKANQDIAQSRV 120

J1A ESLAQKRQDELAGARTEAAQIIDGAKETGKTQESKIIAEAHDEAKRLKEKANQDIAQSRV 120

T2A ESLAQKRQDELAGARTEAAQIIDGAKETGKTQESKIIAEAHDEAKRLKEKANQDIAQSRV 120

M3A ESLAQKRQDELAGARTEAAQIIDGAKETGKTQESKIIAEAHDEAKRLKEKANQDIAQSRV 120

W2 ESLAQKRQDELAGARTEAAQIIDGAKETGKTQESKIIAEAHDEAKRLKEKANQDIAQSRV 120

J1B ESLAQKRQDELAGARTEAAQIIDGAKETGKTQESKIIAEAHDEAKRLKEKANQDIAQSRV 120

R1A ESLAQKRQDELAGARTEAAQIIDGAKETGKTQESKIIAEAHDEAKRLKEKANQDIAQSRV 120

K12 ESLAQKRQDELAGARTEAAQIIDGAKETGKTQESKIIAEAHDEAKRLKGKANQDIAQSRV 120

G1A ERLAQKRQDELAGARTEAAQIIDGAKETGKTQESKIIAEAHDEAKRLKEKANQDIAQSRV 120

M1A ESLAQKRQDELAGARTEAAQIIDGAKETGKTQESKIIAEAHDEAKRLKEKANQDIAQSRV 120

FENELLA ESLAQKRQDELAGARTEAAQIIDGAKETGKTQESKIIAEAHDEAKRLKEKANQDIAQSRV 120

J3A ESLAQKRQDELAGARTEAAQIIDGAKETGKTQESKIIAEAHDEAKRLKEKANQDIAQSRV 120

G3B ERLAQKRQDELAGARTEAAQIIDGAKETGKTQESKIIAEAHDEAKRLKEKANQDIAQSRV 120

* ********************************************** ***********

M3BA

EALAGVKGEVADLTVLLAEKVMKQNLDAKAQSDLIDSYLDQLGDA 165

J1A

EALAGVKGEVADLTVLLAEKVMKQNLDAKAQSDLIDSYLDQLGDA 165

T2A

EALAGVKGEVADLTVLLAEKVMKQNLDAKAQSDLIDSYLDQLGDA 165

M3A

EALAGVKGEVADLTVLLAEKVMKQNLDAKAQSDLIDSYLDQLGDA 165

W2

EALAGVKGEVADLTVLLAEKVMKQNLDAKAQSDLIDSYLDQLGDA 165

J1B

EALAGVKGEVADLTVLLAEKVMKQNLDAKAQSDLIDSYLDQLGDA 165

R1A

EALAGVKGEVADLTVLLAEKVMKQNLDAKAQSDLIDSYLDQLGDA 165

K12

EALAGVKGEVADLTVLLAEKVMKQNLDAKAQSDLIDSYLDQLGDA 165

G1A

EALAGVKGEVADLTVLLAEKVMKQNLDAKAQSDLIDSYLDQLGDA 165

M1A

EALAGVKGEVADLTVLLAEKVMKQNLDAKAQSDLIDSYLDQLGDA 165

FENELLA

EALAGVKGEVADLTVLLAEKVMKQNLDAKAQSDLIDSYLDQLGDA 165

J3A

EALAGVKGEVADLTVLLAEKVMKQNLDAKAQSDLIDSYLDQLGDA 165

G3B

EALAGVKGEVADLTVLLAEKVMKQNLDAKAQSDLIDSYLDQLGDA 165

*********************************************

**Subunit Delta**

M3BA MDKKTQALVEQYARSLVEVAFEQDAVSTIQEEVRQILTVFAETNLKTFLSQENVTSEAKK 60

J1A MDKKTQALVEQYARSLVEVAFEQDAVSTIQEEVRQILTVFAETNLKTFLSQENVTSEAKK 60

T2A MDKKTQALVEQYARSLVEVAFEQDAVSTIQEEVRQILTVFAETNLKTFLSQENVTSEAKK 60

M3A MDKKTQALVEQYARSLVEVAFEQDAVSTIQEEVRQILTVFAETNLKTFLSQENVTSEAKK 60

W2 MDKKTQALVEQYARSLVEVAFEQDAVSTIQEEVRHILTVFAETNLKTFLSQENVTSEAKK 60

J1B MDKKTQALVEQYARSLVEVAFEQDAVSTIQEEVRQILTVFAETNLKTFLSQENVTSEAKK 60

R1A MDKKTQALVEQYARSLVEVAFEQDAVSTIQEEVRQILTVFAETNLKTFLSQENVTSEAKK 60

K12 MDKKTQALVEQYARSLVEVAFEQDAVSTIQEEVRQILTVFAETNLKNFLSQENVTSEAKK 60

G1A MDKKTQALVEQYARSLVEVAFEQDAVSTIQEEVRQILTVFAETNLKTFLSQENVTSEAKK 60

M1A MDKKTQALVEQYARSLVEVAFEQDAVSTIQEEVRQILTVFSETNLKNFLSQENVTSEAKK 60

Fenella MDKKTQALVEQYARSLVEVAFEQDAVSTIQEEVRQILTVFAETNLKTFLSQENVTSEAKK 60

J3A MDKKTQALVEQYARSLVEVAFEQDAVSTIQEEVRQILTVFDETNLKTFLSQENVTSEAKK 60

G3B MDKKTQALVEQYARSLVEVAFEQDAVSTIQEEVRQILTVFAETNLKTFLSQENVTSEAKK 60

**********************************:***** *****.*************

M3BA ESLSLFQESCSVYMNNFLEVILLNDRANILYDVLKLVLELFDQEDNTYDVTVTSASPLSE 120

J1A ESLSLFQESCSVYMNNFLEVILLNDRANILYDVLKLVLELFDQEDNTYDVTVTSASPLSE 120

T2A ESLSLFQESCSVYMNNFLEVILLNDRANILYDVLKLVLELFDQEDNTYDVTVTSASPLSE 120

M3A ESLSLFQESCSVYMNNFLEVILLNDRANILYDVLKLVLELFDQEDNTYDVTVTSASPLSE 120

W2 ESLSLFQESCSVYMNNFLEVILLNDRANILYDVLKLVLELFDQEDNTYDVTVTSASPLSE 120

J1B ESLSLFQESCSVYMNNFLEVILLNDRANILYDVLKLVLELFDQEDNTYDVTVTSASPLSE 120

R1A ESLSLFQESCSVYMNNFLEVILLNDRANILYDVLKLVLELFDQEDNTYDVTVTSASPLSE 120

K12 ESLSLFQESCSVYMNNFLEVILLNDRANILYDVLKLVLELFDQEDNTYDVTVTSASPLSE 120

G1A ESLSLFQESCSVYMNNFLEVILLNDRANILYDVLKLVLELFDQEDNTYDVTVTSASPLSE 120

M1A ESLSLFQESCSVYMNNFLEVILLNDRANILYDVLKLVLELFDQEDNTYDVTVTSASPLSE 120

Fenella ESLSLFQESCSVYMNNFLEVILLNDRANILYDVLKLVLELFDQEDNTYDVTVTSASPLSE 120

J3A ESLSLFQESCSVYMNNFLEVILLNDRANILYDVLKLVLELFDQEDNTYDVTVTSASPLSE 120

G3B ESLSLFQESCSVYMNNFLEVILLNDRANILYDVLKLVLELFDQEDNTYDVTVTSASPLSE 120

************************************************************

M3BA EQKARLLAIVSQKFEIKTRRLVEKIDEDLIGGFVIKAKNKVVDTSIRSQLQTFKTNLK 178

J1A EQKARLLAIVSQKFEIKTRRLVEKIDEDLIGGFVIKAKNKVVDTSIRSQLQTFKTNLK 178

T2A EQKARLLAIVSQKFEIKTRRLVEKIDEDLIGGFVIKAKNKVVDTSIRSQLQTFKTNLK 178

M3A EQKARLLAIVSQKFEIKTRRLVEKIDEDLIGGFVIKAKNKVVDTSIRSQLQTFKTNLK 178

W2 EQKARLLAIVSQKFEIKTRRLVEKIDEDLIGGFVIKAKNKVVDTSIRSQLQTFKTNLK 178

J1B EQKARLLAIVSQKFEIKTRRLVEKIDEDLIGGFVIKAKNKVVDTSIRSQLQTFKTNLK 178

R1A EQKARLLAIVSQKFEIKTRRLVKKIDEDLIGGFVIKAKNKVVDTSIRSQLQTFKTNLK 178

K12 EQKARLLAIVSQKFEIKTRRLVEKIDEDLIGGFVIKAKNKVVDTSIRSQLQTFKTNLK 178

G1A EQKARLLAIVSQKFEIKTRRLVEKIDEDLIGGFVIKAKNKVVDTSIRSQLQTFKTNLK 178

M1A EQKARLLAIVSQKFEIKTRRLVEKIDEDLIGGFVIKAKNKVVDTSIRSQLQTFKTNLK 178

Fenella EQKARLLAIVSQKFEIKTRRLVEKIDEDLIGGFVIKAKNKVVDTSIRSQLQTFKTNLK 178

J3A EQKARLLAIVSQKFEIKTRRLVEKIDEDLIGGFVIKAKNKVVDTSIRSQLQTFKTNLK 178

G3B EQKARLLAIVSQKFEIKTRRLVEKIDEDLIGGFVIKAKNKVVDTSIRSQLQTFKTNLK 178

**********************:***********************************

**Subunit Alpha**

M3BA LAINAQEISALIKKQIENFQPNFDVTETGVVTYIGDGIARARGLDNAMSGELLEFENGAY 60

J1A LAINAQEISALIKKQIENFQPNFDVTETGVVTYIGDGIARARGLDNAMSGELLEFENGAY 60

T2A LAINAQEISALIKKQIENFQPNFDVTETGVVTYIGDGIARARGLDNAMSGELLEFENGAY 60

M3A LAINAQEISALIKKQIENFQPNFDVTETGVVTYIGDGIARARGLDNAMSGELLEFENGAY 60

W2 LAINAQEISALIKKQIENFQPNFDVTETGVVTYIGDGIARARGLDNAMSGELLEFENGAY 60

J1B LAINAQEISALIKKQIENFQPNFDVTETGVVTYIGDGIARARGLDNAMSGELLEFENGAY 60

R1A LAINAQEISALIKKQIENFQPNFDVTETGVVTYIGDGIARARGLDNAMSGELLEFENGAY 60

K12 LAINAQEISALIKKQIENFQPNFDVTETGVVTYIGDGIARARGLDNAMSGELLEFENGAY 60

G1A LAINAQEISALIKKQIENFQPNFDVTETGVVTYIGDGIARARGLDNAMSGELLEFENGAY 60

M1A LAINAQEISALIKKQIENFQPNFDVTETGVVTYIGDGIARARGLDNAMSGELLEFENGAY 60

Fenella LAINAQEISALIKKQIENFQPNFDVTETGVVTYIGDGIARARGLDNAMSGELLEFENGAY 60

J3A LAINAQEISALIKKQIENFQPNFDVTETGVVTYIGDGIARARGLDNAMSGELLEFENGAY 60

G3B LAINAQEISALIKKQIENFQPNFDVTETGVVTYIGDGIARARGLDNAMSGELLEFENGAY 60

************************************************************

M3BA GMAQNLETNDVGIIILGDFVAIREGDIVKRTGKIMEVPVGEALIGRVVNPLGQPVDGLGD 120

J1A GMAQNLETNDVGIIILGDFVAIREGDIVKRTGKIMEVPVGEALIGRVVNPLGQPVDGLGD 120

T2A GMAQNLETNDVGIIILGDFVAIREGDIVKRTGKIMEVPVGEALIGRVVNPLGQPVDGLGD 120

M3A GMAQNLETNDVGIIILGDFVAIREGDIVKRTGKIMEVPVGEALIGRVVNPLGQPVDGLGD 120

W2 GMAQNLETNDVGIIILGDFVAIREGDIVKRTGKIMEVPVGEALIGRVVNPLGQPVDGLGD 120

J1B GMAQNLETNDVGIIILGDFVAIREGDIVKRTGKIMEVPVGEALIGRVVNPLGQPVDGLGD 120

R1A GMAQNLETNDVGIIILGDFVAIREGDIVKRTGKIMEVPVGEALIGRVVNPLGQPVDGLGD 120

K12 GMAQNLETNDVGIIILGDFVAIREGDIVKRTGKIMEVPVGEALIGRVVNPLGQPVDGLGD 120

G1A GMAQNLESNDVGIIILGDFVAIREGDIVKRTGKIMEVPVGEALIGRVVNPLGQPVDGLGD 120

M1A GMAQNLETNDVGIIILGDFVAIREGDIVKRTGKIMEVPVGEALIGRVVNPLGQPVDGLGD 120

Fenella GMAQNLESNDVGIIILGDFVAIREGDIVKRTGKIMEVPVGEALIGRVVNPLGQPVDGLGD 120

J3A GMAQNLETNDVGIIILGDFVAIREGDIVKRTGKIMEVPVGEALIGRVVNPLGQPVDGLGD 120

G3B GMAQNLESNDVGIIILGDFVAIREGDIVKRTGKIMEVPVGEALIGRVVNPLGQPVDGLGD 120

*******:****************************************************

M3BA IETTGFRPVETPAPGVMQRKSVSEPLQTGLKAIDALVPIGRGQRELVIGDRQTGKTSVAI 180

J1A IETTGFRPVETPAPGVMQRKSVSEPLQTGLKAIDALVPIGRGQRELVIGDRQTGKTSVAI 180

T2A IETTGFRPVETPAPGVMQRKSVSEPLQTGLKAIDALVPIGRGQRELVIGDRQTGKTSVAI 180

M3A IETTGFRPVETPAPGVMQRKSVSEPLQTGLKAIDALVPIGRGQRELVIGDRQTGKTSVAI 180

W2 IETTGFRPVETPAPGVMQRKSVSEPLQTGLKAIDALVPIGRGQRELVIGDRQTGKTSVAI 180

J1B IETTGFRPVETPAPGVMQRKSVSEPLQTGLKAIDALVPIGRGQRELVIGDRQTGKTSVAI 180

R1A IETTGFRPVETPAPGVMQRKSVSEPLQTGLKAIDALVPIGRGQRELVIGDRQTGKTSVAI 180

K12 IETTGFRPVETPAPGVMQRKSVSEPLQTGLKAIDALVPIGRGQRELVIGDRQTGKTSVAI 180

G1A IETTGFRPVETPAPGVMQRKSVSEPLQTGLKAIDALVPIGRGQRELVIGDRQTGKTSVAI 180

M1A IETTGFRPVETPAPGVMQRKSVSEPLQTGLKAIDALVPIGRGQRELVIGDRQTGKTSVAI 180

Fenella IETTGFRPVETPAPGVMQRKSVSEPLQTGLKAIDALVPIGRGQRELVIGDRQTGKTSVAI 180

J3A IETTGFRPVETPAPGVMQRKSVSEPLQTGLKAIDALVPIGRGQRELIIGDRQTGKTSVAI 180

G3B IETTGFRPVETPAPGVMQRKSVSEPLQTGLKAIDALVPIGRGQRELVIGDRQTGKTSVAI 180

**********************************************:*************

M3BA DAILNQKGQDMICIYVAIGQKESTVRTQVETLRKHGALDYTIVVTASASQPSPLLYIAPY 240

J1A DAILNQKGQDMICIYVAIGQKESTVRTQVETLRKHGALDYTIVVTASASQPSPLLYIAPY 240

T2A DAILNQKGQDMICIYVAIGQKESTVRTQVETLRKHGALDYTIVVTASASQPSPLLYIAPY 240

M3A DAILNQKGQDMICIYVAIGQKESTVRTQVETLRKHGALDYTIVVTASASQPSPLLYIAPY 240

W2 DAILNQKGQDMICIYVAIGQKESTVRTQVETLRKHGALDYTIVVTASASQPSPLLYIAPY 240

J1B DAILNQKGQDMICIYVAIGQKESTVRTQVETLRKHGALDYTIVVTASASQPSPLLYIAPY 240

R1A DAILNQKGQDMICIYVAIGQKESTVRTQVETLRKHGALDYTIVVTASASQPSPLLYIAPY 240

K12 DAILNQKGQDMICIYVAIGQKESTVRTQVETLRKHGALDYTIVVTASASQPSPLLYIAPY 240

G1A DAILNQKGQDMICIYVAIGQKESTVRTQVETLRKHGALDYTIVVTASASQPSPLLYIAPY 240

M1A DAILNQKGQDMICIYVAIGQKESTVRTQVETLRKHGALDYTIVVTASASQPSPLLYIAPY 240

Fenella DAILNQKGQDMICIYVAIGQKESTVRTQVETLRKHGALDYTIVVTASASQPSPLLYIAPY 240

J3A DAILNQKGQDMICIYVAIGQKESTVRTQVETLRKHGALDYTIVVTASASQPSPLLYIAPY 240

G3B DAILNQKGQDMICIYVAIGQKESTVRTQVETLRKHGALDYTIVVTASASQPSPLLYIAPY 240

************************************************************

M3BA AGVAMAEEFMYNGKHVLIVYDDLSKQAVAYRELSLLLRRPPGREAYPGDVFYLHSRLLER 300

J1A AGVAMAEEFMYNGKHVLIVYDDLSKQAVAYRELSLLLRRPPGREAYPGDVFYLHSRLLER 300

T2A AGVAMAEEFMYNGKHVLIVYDDLSKQAVAYRELSLLLRRPPGREAYPGDVFYLHSRLLER 300

M3A AGVAMAEEFMYNGKHVLIVYDDLSKQAVAYRELSLLLRRPPGREAYPGDVFYLHSRLLER 300

W2 AGVAMAEEFMYNGKHVLIVYDDLSKQAVAYRELSLLLRRPPGREAYPGDVFYLHSRLLER 300

J1B AGVAMAEEFMYNGKHVLIVYDDLSKQAVAYRELSLLLRRPPGREAYPGDVFYLHSRLLER 300

R1A AGVAMAEEFMYNGKHVLIVYDDLSKQAVAYRELSLLLRRPPGREAYPGDVFYLHSRLLER 300

K12 AGVAMAEEFMYNGKHVLIVYDDLSKQAVAYRELSLLLRRPPGREAYPGDVFYLHSRLLER 300

G1A AGVAMAEEFMYNGKHVLIVYDDLSKQAVAYRELSLLLRRPPGREAYPGDVFYLHSRLLER 300

M1A AGVAMAEEFMYNGKHVLIVYDDLSKQAVAYRELSLLLRRPPGREAYPGDVFYLHSRLLER 300

Fenella AGVAMAEEFMYNGKHVLIVYDDLSKQAVAYRELSLLLRRPPGREAYPGDVFYLHSRLLER 300

J3A AGVAMAEEFMYNGKHVLIVYDDLSKQAVAYRELSLLLRRPPGREAYPGDVFYLHSRLLER 300

G3B AGVAMAEEFMYNGKHVLIVYDDLSKQAVAYRELSLLLRRPPGREAYPGDVFYLHSRLLER 300

************************************************************

M3BA SAKVSDDLGGGSITALPIIQTQAGDISAYIATNVISITDGQIFLQENLFNSGIRPAIDAG 360

J1A SAKVSDDLGGGSITALPIIQTQAGDISAYIATNVISITDGQIFLQENLFNSGIRPAIDAG 360

T2A SAKVSDDLGGGSITALPIIQTQAGDISAYIATNVISITDGQIFLQENLFNSGIRPAIDAG 360

M3A SAKVSDDLGGGSITALPIIQTQAGDISAYIATNVISITDGQIFLQENLFNSGIRPAIDAG 360

W2 SAKVSDDLGGGSITALPIIQTQAGDISAYIATNVISITDGQIFLQENLFNSGIRPAIDAG 360

J1B SAKVSDDLGGGSITALPIIQTQAGDISAYIATNVISITDGQIFLQENLFNSGIRPAIDAG 360

R1A SAKVSDDLGGGSITALPIIQTQAGDISAYIATNVISITDGQIFLQENLFNSGIRPAIDAG 360

K12 SAKVSDDLGGGSITALPIIQTQAGDISAYIATNVISITDGQIFLQENLFNSGIRPAIDAG 360

G1A SAKVSDDLGGGSITALPIIQTQAGDISAYIATNVISITDGQIFLQENLFNSGIRPAIDAG 360

M1A SAKVSDDLGGGSITALPIIQTQAGDISAYIATNVISITDGQIFLQENLFNSGIRPAIDAG 360

Fenella SAKVSDDLGGGSITALPIIQTQAGDISAYIATNVISITDGQIFLQENLFNSGIRPAIDAG 360

J3A SAKVSDDLGGGSITALPIIQTQAGDISAYIATNVISITDGQIFLQENLFNSGIRPAIDAG 360

G3B SAKVSDDLGGGSITALPIIQTQAGDISAYIATNVISITDGQIFLQENLFNSGIRPAIDAG 360

************************************************************

M3BA SSVSRVGGSAQIKAMKKVAGTLRLDLASYRELEAFTQFGSDLDAATQAKLNRGRRTIEVL 420

J1A SSVSRVGGSAQIKAMKKVAGTLRLDLASYRELEAFTQFGSDLDAATQAKLNRGRRTIEVL 420

T2A SSVSRVGGSAQIKAMKKVAGTLRLDLASYRELEAFTQFGSDLDAATQAKLNRGRRTIEVL 420

M3A SSVSRVGGSAQIKAMKKVAGTLRLDLASYRELEAFTQFGSDLDAATQAKLNRGRRTIEVL 420

W2 SSVSRVGGSAQIKAMKKVAGTLRLDLASYRELEAFTQFGSDLDAATQAKLNRGRRTIEVL 420

J1B SSVSRVGGSAQIKAMKKVAGTLRLDLASYRELEAFTQFGSDLDAATQAKLNRGRRTIEVL 420

R1A SSVSRVGGSAQIKAMKKVAGTLRLDLASYRELEAFTQFGSDLDAATQAKLNRGRRTIEVL 420

K12 SSVSRVGGSAQIKAMKKVAGTLRLDLASYRELEAFTQFGSDLDAATQAKLNRGRRTIEVL 420

G1A SSVSRVGGSAQIKAMKKVAGTLRLDLASYRELEAFTQFGSDLDAATQAKLNRGRRTIEVL 420

M1A SSVSRVGGSAQIKAMKKVAGTLRLDLASYRELEAFTQFGSDLDAATQAKLNRGRRTIEVL 420

Fenella SSVSRVGGSAQIKAMKKVAGTLRLDLASYRELEAFTQFGSDLDAATQAKLNRGRRTIEVL 420

J3A SSVSRVGGSAQIKAMKKVAGTLRLDLASYRELEAFTQFGSDLDAATQAKLNRGRRTIEVL 420

G3B SSVSRVGGSAQIKAMKKVAGTLRLDLASYRELEAFTQFGSDLDAATQAKLNRGRRTIEVL 420

************************************************************

M3BA KQPLHKPLPVEKQVVILYALTHGFLDSVPVDQILDFEEALYDYFDSHHEDIFETIRTTKD 480

J1A KQPLHKPLPVEKQVVILYALTHGFLDSVPVDQILDFEEALYDYFDGHHEDIFETIRTTKD 480

T2A KQPLHKPLPVEKQVVILYALTHGFLDSVPVDQILDFEEALYDYFDGHHEDIFETIRTTKD 480

M3A KQPLHKPLPVEKQVVILYALTHGFLDSVPVDQILDFEEALYDYFDSHHEDIFETIRTTKD 480

W2 KQPLHKPLPVEKQVVILYALTHGFLDSVPVDQILDFEEALYDYFDSHHEDIFETIRTTKD 480

J1B KQPLHKPLPVEKQVVILYALTHGFLDSVPVDQILDFEEALYDYFDGHHEDIFETIRTTKD 480

R1A KQPLHKPLPVEKQVVILYALTHGFLDSVPVDQILDFEEALYDYFDGHHEDIFETIRTTKD 480

K12 KQPLHKPLPVEKQVVILYALTHGFLDSVPVDQILDFEEALYDYFDSHHEDIFETIRTTKD 480

G1A KQPLHKPLPVEKQVVILYALTHGFLDSVPVDQILDFEEALYDYFDSHHEDIFETIRTTKD 480

M1A KQPLHKPLPVEKQVVILYALTHGFLDSVPVDQILDFEEALYDYFDSHHEDIFETIRTTKD 480

Fenella KQPLHKPLPVEKQVVILYALTHGFLDSVPVDQILDFEEALYDYFDGHHEDIFETIRTTKD 480

J3A KQPLHKPLPVEKQVVILYALTHGFLDSVPVDQILDFEEALYDYFDSHHEDIFETIRTTKD 480

G3B KQPLHKPLPVEKQVVILYALTHGFLDSVPVDQILDFEEALYDYFDSHHEDIFETIRTTKD 480

*********************************************.**************

M3BA LPEESVLNEAIQAFKDQSEYK 501

J1A LPEESVLNEAIQAFKDQSEYK 501

T2A LPEESVLNEAIQAFKDQSEYK 501

M3A LPEESVLNEAIQAFKDQSEYK 501

W2 LPEESVLNEAIQAFKDQSEYK 501

J1B LPEESVLNEAIQAFKDQSEYK 501

R1A LPEESVLNEAIQAFKDQSEYK 501

K12 IPEESVLNEAIQAFKDQSEYK 501

G1A LPEESVLNEAIQVFKDQSEYK 501

M1A LPEESVLNEAIQAFKDQSEYK 501

Fenella LPEESVLNEAIQAFKDQSEYK 501

J3A IPEESVLNEAIQAFKDQSEYK 501

G3B LPEESVLNEAIQVFKDQSEYK 501

:***********.********

**Subunit Gamma**

M3BA MAGSLREIQAKIASTKKTSQITGAMQMVSASKLTRSEQAAKDFQIYASKIRQITTDLLHS 60

J1A MAGSLREIQAKIASTKKTSQITGAMQMVSASKLTRSEQAAKDFQIYASKIRQITTDLLHS 60

T2A MAGSLREIQAKIASTKKTSQITGAMQMVSASKLTRSEQAAKDFQIYASKIRQITTDLLHS 60

M3A MAGSLREIQAKIASTKKTSQITGAMQMVSASKLTRSEQAAKDFQIYASKIRQITTDLLHS 60

W2 MAGSLREIQAKIASTKKTSQITGAMQMVSASKLTRSEQAAKDFQIYASKIRQITTDLLHS 60

J1B MAGSLREIQAKIASTKKTSQITGAMQMVSASKLTRSEQAAKDFQIYASKIRQITTDLLHS 60

R1A MAGSLREIQAKIASTKKTSQITGAMQMVSASKLTRSEQAAKDFQIYASKIRQITTDLLHS 60

K12 MAGSLREIQAKIASTKKTSQITGAMQMVSASKLTRSEQAAKDFQIYASKIRQITTDLLHS 60

G1A MAGSLREIQAKIASTKKTSQITGAMQMVSASKLTRSEQAAKDFQIYASKIRQITTDLLHS 60

M1A MAGSLREIQAKIASTKKTSQITGAMQMVSASKLTRSEQAAKDFQIYASKIRQITTDLLHS 60

Fenella MAGSLREIQAKIASTKKTSQITGAMQMVSASKLTRSEQAAKDFQIYASKIRQITTDLLHS 60

J3A MAGSLREIQAKIASTKKTSQITGAMQMVSASKLTRSEQAAKDFQIYASKIRQITTDLLHS 60

G3B MAGSLREIQAKIASTKKTSQITGAMQMVSASKLTRSEQAAKDFQIYASKIRQITTDLLHS 60

************************************************************

M3BA ELINGSSNPMLDARPVRKTGYIVITSDKGLVGGYNSTILKAVLDMIKRDHDSEDEYAIIS 120

J1A ELINGSSNPMLDARPVRKTGYIVITSDKGLVGGYNSTILKAVLDMIKRDHDSEDEYAIIS 120

T2A ELINGSSNPMLDARPVRKTGYIVITSDKGLVGGYNSTILKAVLDMIKRDHDSEDEYAIIS 120

M3A ELINGSSNPMLDARPVRKTGYIVITSDKGLVGGYNSTILKAVLDMIKRDHDSEDEYAIIS 120

W2 ELINGSSNPMLDARPVRKTGYIVITSDKGLVGGYNSTILKAVLDMIKRDHDSEDEYAIIS 120

J1B ELINGSSNPMLDARPVRKTGYIVITSDKGLVGGYNSTILKAVLDMIKRDHDSEDEYAIIS 120

R1A ELINGSSNPMLDARPVRKTGYIVITSDKGLVGGYNSTILKAVLDMIKRDHDSEDEYAIIS 120

K12 ELINGSSNPMLDARPVRKTGYIVITSDKGLVGGYNSTILKAVLDMIKRDHDSEDEYAIIS 120

G1A ELINGSSNPMLDARPVRKTGYIVITSDKGLVGGYNSTILKAVLDMIKRDHDSEDEYAIIS 120

M1A ELINGSSNPMLDARPVRKTGYIVITSDKGLVGGYNSTILKAVLDMIKRDHDSEDEYAIIS 120

Fenella ELINGSSNPMLDARPVRKTGYIVITSDKGLVGGYNSTILKAVLDMIKRDHDSEDEYAIIS 120

J3A ELINGSSNPMLDARPVRKTGYIVITSDKGLVGGYNSTILKAVLDMIKRDHDSEDEYAIIS 120

G3B ELINGSSNPMLDARPVRKTGYIVITSDKGLVGGYNSTILKAVLDMIKRDHDSEDEYAIIS 120

************************************************************

M3BA IGGTGSDFFKARNMNVAFELRGLEDQPSFDQVGKIISKAVGMYQNELFDELYVCYNHHVN 180

J1A IGGTGSDFFKARNMNVAFELRGLEDQPSFEQVGKIISKAVGMYQNELFDELYVCYNHHVN 180

T2A IGGTGSDFFKARNMNVAFELRGLEDQPSFEQVGKIISKAVGMYQNELFDELYVCYNHHVN 180

M3A IGGTGSDFFKARNMNVAFELRGLEDQPSFDQVGKIISKAVGMYQNELFDELYVCYNHHVN 180

W2 IGGTGSDFFKARNMNVAFELRGLEDQPSFEQVGKIISKAVGMYQNELFDELYVCYNHHVN 180

J1B IGGTGSDFFKARNMNVAFELRGLEDQPSFEQVGKIISKAVGMYQNELFDELYVCYNHHVN 180

R1A IGGTGSDFFKARNMNVAFELRGLEDQPSFEQVGKIISKAVGMYQNELFDELYVCYNHHVN 180

K12 IGGTGSDFFKARNMNVAFELRGLEDQPSFDQVGKIISKAVGMYQNELFDELYVCYNHHVN 180

G1A IGGTGSDFFKARNMNVAFELRGLEDQPSFDQVGKIISKAVGMYQNELFDELYVCYNHHVN 180

M1A IGGTGSDFFKARNMNVAFELRGLEDQPSFEQVGKIISKAVGMYQNELFDELYVCYNHHVN 180

Fenella IGGTGSDFFKARNMNVAFELRGLEDQPSFEQVGKIISKAVGMYQNELFDELYVCYNHHVN 180

J3A IGGTGSDFFKARNMNVAFELRGLEDQPSFDQVGKIISKAVGMYQNELFDELYVCYNHHVN 180

G3B IGGTGSDFFKARNMNVAFELRGLEDQPSFDQVGKIISKAVGMYQNELFDELYVCYNHHVN 180

*****************************:******************************

M3BA SLSSEVRVEQMLPIADLDPNESEGHVLTKFELEPDRDTILDQLLPQYAESLIYGAIVDAK 240

J1A SLSSEVRVEQMLPIADLDPNESEGHVLTKFELEPDRDTILDQLLPQYAESLIYGAIVDAK 240

T2A SLSSEVRVEQMLPIADLDPNESEGHVLTKFELEPDRDTILDQLLPQYAESLIYGAIVDAK 240

M3A SLSSEVRVEQMLPIADLDPNESEGHVLTKFELEPDRDTILDQLLPQYAESLIYGAIVDAK 240

W2 SLSSEVRVEQMLPIADLDPNESEGHVLTKFELEPDRDTILDQLLPQYAESLIYGAIVDAK 240

J1B SLSSEVRVEQMLPIADLDPNESEGHVLTKFELEPDRDTILDQLLPQYAESLIYGAIVDAK 240

R1A SLSSEVRVEQMLPIADLDPNESEGHVLTKFELEPDRDTILDQLLPQYAESLIYGAIVDAK 240

K12 SLSSEVRVEQMLPIADLDPNESEGHVLTKFELEPDRDTILDQLLPQYAESLIYGAIVDAK 240

G1A SLSSEVRVEQMLPIADLDPNESEGHVLTKFELEPDRDTILDQLLPQYAESLIYGAIVDAK 240

M1A SLSSEVRVEQMLPIADLDPNESEGHVLTKFELEPDRDTILDQLLPQYAESLIYGAIVDAK 240

Fenella SLSSEVRVEQMLPIADLDPNESEGHVLTKFELEPDRDTILDQLLPQYAESLIYGAIVDAK 240

J3A SLSSEVRVEQMLPIADLDPNESEGHVLTKFELEPDRDTILDQLLPQYAESLIYGAIVDAK 240

G3B SLSSEVRVEQMLPIADLDPNESEGHVLTKFELEPDRDTILDQLLPQYAESLIYGAIVDAK 240

************************************************************

M3BA TAEHAAGMTAMQTATDNAKNVINDLTIQYNRARQAAITQEITEIVGGASALE 292

J1A TAEHAAGMTAMQTATDNAKNVINDLTIQYNRARQAAITQEITEIVGGASALE 292

T2A TAEHAAGMTAMQTATDNAKNVINDLTIQYNRARQAAITQEITEIVGGASALE 292

M3A TAEHAAGMTAMQTATDNAKNVINDLTIQYNRARQAAITQEITEIVGGASALE 292

W2 TAEHAAGMTAMQTATDNAKNVINDLTIQYNRARQAAITQEITEIVGGASALE 292

J1B TAEHAAGMTAMQTATDNAKNVINDLTIQYNRARQAAITQEITEIVGGASALE 292

R1A TAEHAAGMTAMQTATDNAKNVINDLTIQYNRARQAAITQEITEIVGGASALE 292

K12 TAEHAAGMTAMQTATDNAKNVINDLTIQYNRARQAAITQEITEIVGGASALE 292

G1A TAEHAAGMTAMQTATDNAKNVINDLTIQYNRARQAAITQEITEIVGGASALE 292

M1A TAEHAAGMTAMQTATDNAKNVINDLTIQYNRARQAAITQEITEIVGGASALE 292

Fenella TAEHAAGMTAMQTATDNAKNVINDLTIQYNRARQAAITQEITEIVGGASALE 292

J3A TAEHAAGMTAMQTATDNAKNVINDLTIQYNRARQAAITQEITEIVGGASALE 292

G3B TAEHAAGMTAMQTATDNAKNVINDLTIQYNRARQAAITQEITEIVGGASALE 292

****************************************************

**Subunit Beta**

M3BA MSSGKIAQVVGPVVDVAFAAGDKLPEINNALVVYTDEQKSKRIVLEVALELGEGVVRTIA 60

J1A MSSGKIAQVVGPVVDVAFAAGDKLPEINNALVVYTDEQKSKRIVLEVALELGEGVVRTIA 60

T2A MSSGKIAQVVGPVVDVAFAAGDKLPEINNALVVYTDEQKSKRIVLEVALELGEGVVRTIA 60

M3A MSSGKIAQVVGPVVDVAFAAGDKLPEINNALVVYTDEQKSKRIVLEVALELGEGVVRTIA 60

W2 MSSGKIAQVVGPVVDVAFAAGDKLPEINNALVVYTDEQKSKRIVLEVALELGEGVVRTIA 60

J1B MSSGKIAQVVGPVVDVAFAAGDKLPEINNALVVYTDEQKSKRIVLEVALELGEGVVRTIA 60

R1A MSSGKIAQVVGPVVDVAFAAGDKLPEINNALVVYTDEQKSKRIVLEVALELGEGVVRTIA 60

K12 MSSGKIAQVVGPVVDVAFAAGDKLPEINNALVVYTDEQKSKRIVLEVALELGEGVVRTIA 60

G1A MSSGKIAQVVGPVVDVAFAAGDKLPEINNALVVYTDEQKSKRIVLEVALELGEGVVRTIA 60

M1A MSSGKIAQVVGPVVDVAFAAGDKLPEINNALVVYTDEQKSKRIVLEVALELGEGVVRTIA 60

FENELLA MSSGKIAQVVGPVVDVAFAAGDKLPEINNALVVYTDEQKSKRIVLEVALELGEGVVRTIA 60

J3A MSSGKIAQVVGPVVDVAFAAGDKLPEINNALVVYTDEQKSKRIVLEVALELGEGVVRTIA 60

G3B MSSGKIAQVVGPVVDVAFAAGDKLPEINNALVVYTDEQKSKRIVLEVALELGEGVVRTIA 60

************************************************************

M3BA MESTDGLTRGLEVLDTGRPISVPVGKDTLGRVFNVLGDTIDLEAPFAEDAEREPIHKKAP 120

J1A MESTDGLTRGLEVLDTGRPISVPVGKDTLGRVFNVLGDTIDLEAPFADDAEREPIHKKAP 120

T2A MESTDGLTRGLEVLDTGRPISVPVGKDTLGRVFNVLGDTIDLEAPFADDAEREPIHKKAP 120

M3A MESTDGLTRGLEVLDTGRPISVPVGKDTLGRVFNVLGDTIDLEAPFAEDAEREPIHKKAP 120

W2 MESTDGLTRGLEVLDTGRPISVPVGKDTLGRVFNVLGDTIDLEAPFAEDAEREPIHKKAP 120

J1B MESTDGLTRGLEVLDTGRPISVPVGKDTLGRVFNVLGDTIDLEAPFADDAEREPIHKKAP 120

R1A MESTDGLTRGLEVLDTGRPISVPVGKDTLGRVFNVLGDTIDLEAPFADDAEREPIHKKAP 120

K12 MESTDGLTRGLEVLDTGRPISVPVGKDTLGRVFNVLGDTIDLEAPFAEDAEREPIHKKAP 120

G1A MESTDGLTRGLEVLDTGRPISVPVGKDTLGRVFNVLGDTIDLEAPFAEDAEREPIHKKAP 120

M1A MESTDGLTRGLEVLDTGRPISVPVGKDTLGRVFNVLGDTIDLEAPFAEDAEREPIHKKAP 120

FENELLA MESTDGLTRGLEVLDTGRPISVPVGKDTLGRVFNVLGDTIDLEAPFADDAEREPIHKKAP 120

J3A MESTDGLTRGLEVLDTGRPISVPVGKDTLGRVFNVLGDTIDLEAPFAEDAEREPIHKKAP 120

G3B MESTDGLTRGLEVLDTGRPISVPVGKDTLGRVFNVLGDTIDLEAPFAEDAEREPIHKKAP 120

***********************************************:************

M3BA TFDELSTSTEILETGIKVIDLLAPYLKGGKVGLFGGAGVGKTVLIQELIHNIAQEHGGIS 180

J1A TFDELSTSTEILETGIKVIDLLAPYLKGGKVGLFGGAGVGKTVLIQELIHNIAQEHGGIS 180

T2A TFDELSTSTEILETGIKVIDLLAPYLKGGKVGLFGGAGVGKTVLIQELIHNIAQEHGGIS 180

M3A TFDELSTSTEILETGIKVIDLLAPYLKGGKVGLFGGAGVGKTVLIQELIHNIAQEHGGIS 180

W2 TFDELSTSTEILETGIKVIDLLAPYLKGGKVGLFGGAGVGKTVLIQELIHNIAQEHGGIS 180

J1B TFDELSTSTEILETGIKVIDLLAPYLKGGKVGLFGGAGVGKTVLIQELIHNIAQEHGGIS 180

R1A TFDELSTSTEILETGIKVIDLLAPYLKGGKVGLFGGAGVGKTVLIQELIHNIAQEHGGIS 180

K12 TFDELSTSTEILETGIKVIDLLAPYLKGGKVGLFGGAGVGKTVLIQELIHNIAQEHGGIS 180

G1A TFDELSTSTEILETGIKVIDLLAPYLKGGKVGLFGGAGVGKTVLIQELIHNIAQEHGGIS 180

M1A TFDELSTSTEILETGIKVIDLLAPYLKGGKVGLFGGAGVGKTVLIQELIHNIAQEHGGIS 180

FENELLA TFDELSTSTEILETGIKVIDLLAPYLKGGKVGLFGGAGVGKTVLIQELIHNIAQEHGGIS 180

J3A TFDELSTSTEILETGIKVIDLLAPYLKGGKVGLFGGAGVGKTVLIQELIHNIAQEHGGIS 180

G3B TFDELSTSTEILETGIKVIDLLAPYLKGGKVGLFGGAGVGKTVLIQELIHNIAQEHGGIS 180

************************************************************

M3BA VFTGVGERTREGNDLYWEMKESGVIEKTAMVFGQMNEPPGARMRVALTGLTIAEYFRDVE 240

J1A VFTGVGERTREGNDLYWEMKESGVIEKTAMVFGQMNEPPGARMRVALTGLTIAEYFRDVE 240

T2A VFTGVGERTREGNDLYWEMKESGVIEKTAMVFGQMNEPPGARMRVALTGLTIAEYFRDVE 240

M3A VFTGVGERTREGNDLYWEMKESGVIEKTAMVFGQMNEPPGARMRVALTGLTIAEYFRDVE 240

W2 VFTGVGERTREGNDLYWEMKESGVIEKTAMVFGQMNEPPGARMRVALTGLTIAEYFRDVE 240

J1B VFTGVGERTREGNDLYWEMKESGVIEKTAMVFGQMNEPPGARMRVALTGLTIAEYFRDVE 240

R1A VFTGVGERTREGNDLYWEMKESGVIEKTAMVFGQMNEPPGARMRVALTGLTIAEYFRDVE 240

K12 VFTGVGERTREGNDLYWEMKESGVIEKTAMVFGQMNEPPGARMRVALTGLTIAEYFRDVE 240

G1A VFTGVGERTREGNDLYWEMKESGVIEKTAMVFGQMNEPPGARMRVALTGLTIAEYFRDVE 240

M1A VFTGVGERTREGNDLYWEMKESGVIEKTAMVFGQMNEPPGARMRVALTGLTIAEYFRDVE 240

FENELLA VFTGVGERTREGNDLYWEMKESGVIEKTAMVFGQMNEPPGARMRVALTGLTIAEYFRDVE 240

J3A VFTGVGERTREGNDLYWEMKESGVIEKTAMVFGQMNEPPGARMRVALTGLTIAEYFRDVE 240

G3B VFTGVGERTREGNDLYWEMKESGVIEKTAMVFGQMNEPPGARMRVALTGLTIAEYFRDVE 240

************************************************************

M3BA GQDVLLFIDNIFRFTQAGSEVSALLGRMPSAVGYQPTLATEMGQLQERITSTKKGSVTSI 300

J1A GQDVLLFIDNIFRFTQAGSEVSALLGRMPSAVGYQPTLATEMGQLQERITSTKKGSVTSI 300

T2A GQDVLLFIDNIFRFTQAGSEVSALLGRMPSAVGYQPTLATEMGQLQERITSTKKGSVTSI 300

M3A GQDVLLFIDNIFRFTQAGSEVSALLGRMPSAVGYQPTLATEMGQLQERITSTKKGSVTSI 300

W2 GQDVLLFIDNIFRFTQAGSEVSALLGRMPSAVGYQPTLATEMGQLQERITSTKKGSVTSI 300

J1B GQDVLLFIDNIFRFTQAGSEVSALLGRMPSAVGYQPTLATEMGQLQERITSTKKGSVTSI 300

R1A GQDVLLFIDNIFRFTQAGSEVSALLGRMPSAVGYQPTLATEMGQLQERITSTKKGSVTSI 300

K12 GQDVLLFIDNIFRFTQAGSEVSALLGRMPSAVGYQPTLATEMGQLQERITSTKKGSVTSI 300

G1A GQDVLLFIDNIFRFTQAGSEVSALLGRMPSAVGYQPTLATEMGQLQERITSTKKGSVTSI 300

M1A GQDVLLFIDNIFRFTQAGSEVSALLGRMPSAVGYQPTLATEMGQLQERITSTKKGSVTSI 300

FENELLA GQDVLLFIDNIFRFTQAGSEVSALLGRMPSAVGYQPTLATEMGQLQERITSTKKGSVTSI 300

J3A GQDVLLFIDNIFRFTQAGSEVSALLGRMPSAVGYQPTLATEMGQLQERITSTKKGSVTSI 300

G3B GQDVLLFIDNIFRFTQAGSEVSALLGRMPSAVGYQPTLATEMGQLQERITSTKKGSVTSI 300

************************************************************

M3BA QAIYVPADDYTDPAPATAFAHLDSTTNLERKLTQMGIYPAVDPLASSSRALSPEIVGEEH 360

J1A QAIYVPADDYTDPAPATAFAHLDSTTNLERKLTQMGIYPAVDPLASSSRALSPEIVGEEH 360

T2A QAIYVPADDYTDPAPATAFAHLDSTTNLERKLTQMGIYPAVDPLASSSRALSPEIVGEEH 360

M3A QAIYVPADDYTDPAPATAFAHLDSTTNLERKLTQMGIYPAVDPLASSSRALSPEIVGEEH 360

W2 QAIYVPADDYTDPAPATAFAHLDSTTNLERKLTQMGIYPAVDPLASSSRALSPEIVGEEH 360

J1B QAIYVPADDYTDPAPATAFAHLDSTTNLERKLTQMGIYPAVDPLASSSRALSPEIVGEEH 360

R1A QAIYVPADDYTDPAPATAFAHLDSTTNLERKLTQMGIYPAVDPLASSSRALSPEIVGEEH 360

K12 QAIYVPADDYTDPAPATAFAHLDSTTNLERKLTQMGIYPAVDPLASSSRALSPEIVGEEH 360

G1A QAIYVPADDYTDPAPATAFAHLDSTTNLERKLTQMGIYPAVDPLASSSRALSPEIVGEEH 360

M1A QAIYVPADDYTDPAPATAFAHLDSTTNLERKLTQMGIYPAVDPLASSSRALSPEIVGEEH 360

FENELLA QAIYVPADDYTDPAPATAFAHLDSTTNLERKLTQMGIYPAVDPLASSSRALSPEIVGEEH 360

J3A QAIYVPADDYTDPAPATAFAHLDSTTNLERKLTQMGIYPAVDPLASSSRALSPEIVGEEH 360

G3B QAIYVPADDYTDPAPATAFAHLDSTTNLERKLTQMGIYPAVDPLASSSRALSPEIVGEEH 360

************************************************************

M3BA YAVATEVQRVLQRYRELQDIIAILGMDELSDEEKTLVGRARRIQFFLSQNFNVAEQFTGQ 420

J1A YAVATEVQRVLQRYRELQDIIAILGMDELSDEEKTLVGRARRIQFFLSQNFNVAEQFTGQ 420

T2A YAVATEVQRVLQRYRELQDIIAILGMDELSDEEKTLVGRARRIQFFLSQNFNVAEQFTGQ 420

M3A YAVATEVQRVLQRYRELQDIIAILGMDELSDEEKTLVGRARRIQFFLSQNFNVAEQFTGQ 420

W2 YAVATEVQRVLQRYRELQDIIAILGMDELSDEEKTLVGRARRIQFFLSQNFNVAEQFTGQ 420

J1B YAVATEVQRVLQRYRELQDIIAILGMDELSDEEKTLVGRARRIQFFLSQNFNVAEQFTGQ 420

R1A YAVATEVQRVLQRYRELQDIIAILGMDELSDEEKTLVGRARRIQFFLSQNFNVAEQFTGQ 420

K12 YAVATEVQRVLQRYRELQDIIAILGMDELSDEEKTLVGRARRIQFFLSQNFNVAEQFTGQ 420

G1A YAVATEVQRVLQRYRELQDIIAILGMDELSDEEKTLVGRARRIQFFLSQNFNVAEQFTGQ 420

M1A YAVATEVQRVLQRYRELQDIIAILGMDELSDEEKTLVGRARRIQFFLSQNFNVAEQFTGQ 420

FENELLA YAVATEVQRVLQRYRELQDIIAILGMDELSDEEKTLVGRARRIQFFLSQNFNVAEQFTGQ 420

J3A YAVATEVQRVLQRYRELQDIIAILGMDELSDEEKTLVGRARRIQFFLSQNFNVAEQFTGQ 420

G3B YAVATEVQRVLQRYRELQDIIAILGMDELSDEEKTLVGRARRIQFFLSQNFNVAEQFTGQ 420

************************************************************

M3BA PGSYVPVAETVRSFKEILEGKYDNLPEDAFRSVGPIEDVVAKAKAMGY 468

J1A PGSYVPVAETVRSFKEILEGKYDNLPEDAFRSVGPIEDVVAKAKAMGY 468

T2A PGSYVPVAETVRSFKEILEGKYDNLPEDAFRSVGPIEDVVAKAKAMGY 468

M3A PGSYVPVAETVRSFKEILEGKYDNLPEDAFRSVGPIEDVVAKAKAMGY 468

W2 PGSYVPVAETVRSFKEILEGKYDNLPEDAFRSVGPIEDVVAKAKAMGY 468

J1B PGSYVPVAETVRSFKEILEGKYDNLPEDAFRSVGPIEDVVAKAKAMGY 468

R1A PGSYVPVAETVRSFKEILEGKYDNLPEDAFRSVGPIEDVVAKAKAMGY 468

K12 PGSYVPVAETVRSFKEILEGKYDNLPEDAFRSVGPIEDVVAKAKAMGY 468

G1A PGSYVPVAETVRSFKEILEGKYDNLPEDAFRSVGPIEDVVAKAKAMGY 468

M1A PGSYVPVAETVRSFKEILEGKYDNLPEDAFRSVGPIEDVVAKAKAMGY 468

FENELLA PGSYVPVAETVRSFKEILEGKYDNLPEDAFRSVGPIEDVVAKAKAMGY 468

J3A PGSYVPVAETVRSFKEILEGKYDNLPEDAFRSVGPIEDVVAKAKAMGY 468

G3B PGSYVPVAETVRSFKEILEGKYDNLPEDAFRSVGPIEDVVAKAKAMGY 468

************************************************

**Subunit Epsilon**

M3BA MAQMTVQVVTPDGLKYDHHASFIHAVTKDGQIGILPGHINLIAPLEVDELKVRRVDDESH 60

J1A MAQMTVQVVTPDGLKYDHHASFIHAVTKDGQIGILPGHINLIAPLEVDELKVRRVDDESH 60

T2A MAQMTVQVVTPDGLKYDHHASFIHAVTKDGQIGILPGHINLIAPLEVDELKVRRVDDESH 60

M3A MAQMTVQVVTPDGLKYDHHASFIHAVTKDGQIGILPGHINLIAPLEVDELKVRRVDDESH 60

W2 MAQMTVQVVTPDGLKYDHHASFIHAVTKDGQIGILPGHINLIAPLEVDELKVRRVDDESH 60

J1B MAQMTVQVVTPDGLKYDHHASFIHAVTKDGQIGILPGHINLIAPLEVDELKVRRVDDESH 60

R1A MAQMTVQVVTPDGLKYDHHASFIHAVTKDGQIGILPGHINLIAPLEVDELKVRRVDDESH 60

K12 MAQMTVQVVTPDGLKYDHHASFIHAVTKDGQIGILPGHINLIAPLEVDELKVRRVDDESH 60

G1A MAQMTVQVVTPDGLKYDHHASFIHAVTKDGQIGILPGHINLIAPLEVDELKVRRVDDESH 60

M1A MAQMTVQVVTPDGLKYDHHASFIHAVTKDGQIGILPGHINLIAPLEVDELKVRRVDDESH 60

Fenella MAQMTVQVVTPDGLKYDHHASFIHAVTKDGQIGILPGHINLIAPLEVDELKVRRVDDESH 60

J3A MAQMTVQVVTPDGLKYDHHASFIHAVTKDGQIGILPGHINLIAPLEVDELKVRRVDDESH 60

G3B MAQMTVQVVTPDGLKYDHHASFIHAVTKDGQIGILPGHINLIAPLEVDELKVRRVDDESH 60

************************************************************

M3BA VDWIAVNGGIIEVKDDFITIVADSAERERDIDVSRAERAKQRAERDLEEATKSDRIDEVQ 120

J1A VDWIAVNGGIIEVKDDFITIVADSAERERDIDVSRAERAKQRAERDLEEATKSDRIDEVQ 120

T2A VDWIAVNGGIIEVKDDFITIVADSAERERDIDVSRAERAKQRAERDLEEATKSDRIDEVQ 120

M3A VDWIAVNGGIIEVKDDFITIVADSAERERDIDVSRAERAKQRAERDLEEATKSDRIDEVQ 120

W2 VDWIAVNGGIIEVKDDFITIVADSAERERDIDVSRAERAKQRAERDLEEATKSDRIDEVQ 120

J1B VDWIAVNGGIIEVKDDFITIVADSAERERDIDVSRAERAKQRAERDLEEATKSDRIDEVQ 120

R1A VDWIAVNGGIIEVKDDFITIVADSAERERDIDVSRAERAKQRAERDLEEATKSDRIDEVQ 120

K12 VDWIAVNGGIIEVKDDFITIVADSAERERDIDVSRAERAKQRAERDLEEATKSDRIDEVQ 120

G1A VDWIAVNGGIIEVKDDFITIVADSAERERDIDVSRAERAKQRAERDLEEATKSDRIDEVQ 120

M1A VDWIAVNGGIIEVKDDFITIVADSAERERDIDVSRAERAKQRAERDLEEATKSDRIDEVQ 120

Fenella VDWIAVNGGIIEVKDDFITIVADSAERERDIDVSRAERAKQRAERDLEEATKSDRIDEVQ 120

J3A VDWIAVNGGIIEVKDDFITIVADSAERERDIDVSRAERAKQRAERDLEEATKSDRIDEVQ 120

G3B VDWIAVNGGIIEVKDDFITIVADSAERERDIDVSRAERAKQRAERDLEEATKSDRIDEVQ 120

************************************************************

M3BA RAQVALRRALNRISVGTK 138

J1A RAQVALRRALNRISVGTK 138

T2A RAQVALRRALNRISVGTK 138

M3A RAQVALRRALNRISVGTK 138

W2 RAQVALRRALNRISVGTK 138

J1B RAQVALRRALNRISVGTK 138

R1A RAQVALRRALNRISVGTK 138

K12 RAQVALRRALNRISVGTK 138

G1A RAQVALRRALNRISVGTK 138

M1A RAQVALRRALNRISVGTK 138

Fenella RAQVALRRALNRISVGTK 138

J3A RAQVALRRALNRISVGTK 138

G3B RAQVALRRALNRISVGTK 138

******************
